# Supplementary material for: Associations Among Self-reported Physical Activity, Coronary Artery Calcium Scores, and Mortality Risk in Older Adults
Source: PubMed Central journal article supplement — Mayo Clin Proc Innov Qual Outcomes. 2020 Jun 5;4(3):229–37. doi: 10.1016/j.mayocpiqo.2020.02.005 (PMC7283959; doi:10.1016/j.mayocpiqo.2020.02.005), 2020-06-05

Supplemental Figure 2. ACM Event rates per 1000-person years by Physical Activity and CAC Percentile Scores

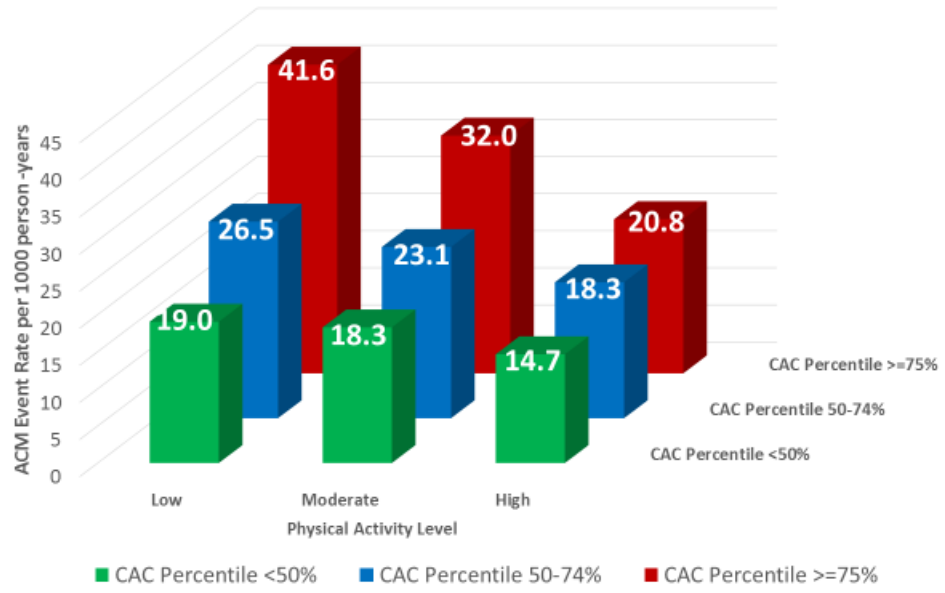

Supplement: mmc2.pdf [file mmc2.pdf]
